# Supplementary material
Source: publisher figshare collection journal article supplement (https://geolsoc.figshare.com/ndownloader/files/22789655)
Supplement: Supplementary file 1 [file 22789655]

Table 1. Preservation, concentration and taxonomic composition of the studied samples.

| Depth of sampling, m | 2.375 | 2.475 | 2.525 | 2.575 | 2.625 |
| --- | --- | --- | --- | --- | --- |
| Preservation state | deteriorated | deteriorated | deteriorated | deteriorated | deteriorated |
| Pollen concentration (number of grains / cm3) | 99 | 45 | 46 | 1275 | 251 |
| Taxa |  |  |  |  |  |
| *Pinus* | 1 | 1 | 1 | 2 | 1 |
| *Quercus* |  |  |  | 1 |  |
|  |  |  |  |  |  |
| Identified |  |  | 1 | 1 | 1 |
